# Supplementary material
Source: publisher site journal article supplement (https://www.dovepress.com/article/433193)
Supplement: Supplementary file 1 [file get_supplementary_file.php]

**Supplementary Table S1.** The independent variables (X1-X29); the dependent variable analyzed and their descriptions in this study.

| **Independent Variable (Nominal)** | **N=1,375; n (%)** | **Independent Variable (Nominal)** | **N=1,375; n (%)** |
| --- | --- | --- | --- |
| X1. CS: Current Smokers | | X8. ST: Sleep Time (hours) | |
| (1) Never | 911 (66.25%) | (1) < 4 | 7 (0.51%) |
| (2) Passive smoking | 56 (4.07%) | (2) 4–6 | 265 (19.27%) |
| (3) Quit | 114 (8.29%) | (3) 6–7 | 811 (58.98%) |
| (4) Occasional | 58 (4.22%) | (4) 7–8 | 248 (18.04%) |
| (5) Addicted | 236 (17.16%) | (5) 8–9 | 44 (3.20%) |
| X2. AD: Alcohol drinker | | (6) > 9 | NA |
| (1) Never | 1143 (83.13%) | X9. MetS | |
| (2) Quit | 17 (1.24%) | (1) No | 1241 (90.25%) |
| (3) 1–2 times a week | 169 (12.29%) | (2) Yes | 134 (9.75%) |
| (4) 3–4 times a week | 39 (2.84%) |  |  |
| (5) 5–6 times a week | NA | **Independent Variable (Interval Scale)** | **Mean ± SD** |
| (6) Addicted | 7 (0.51%) | X10. Age | 33.22 ± 4.36 |
| X3. Vitamin E supplementation | | X11. SBP (Systolic Blood Pressure, mmHg) | 118.22 ± 12.60 |
| (1) No | 1289 (93.75%) | X12. DBP (Diastolic Blood Pressure, mmHg) | 72.99 ± 9.62 |
| (2) Yes | 86 (6.25%) | X13. BMI (Body Mass Index, kg/m2) | 24.27 ± 3.37 |
| X4. Vitamin C supplementation | | X14. BF (Body Fat, %) | 24.36 ± 5.57 |
| (1) No | 1156 (84.07%) | X15. WC (Waist Circumference, cm) | 82.26 ± 8.34 |
| (2) Yes | 219 (15.93%) | X16. WHR (Waist–hip Ratio, %) | 0.84 ± 0.05 |
| X5. Consumption of Omega-3 rich food | | **Independent Variable (Lab Interval data)** | **Mean ± SD** |
| (1) No | 1283 (93.31%) | X17. Hb (Hemoglobin, g/dL) | 15.22 ± 0.99 |
| (2) Yes | 92 (6.69%) | X18. FPG (Fasting Plasma Glucose, mg/dL) | 98.61 ± 10.60 |
| X6. Consumption of sugar-comtaining beverage | | X19. SGOT (Serum Glutamic-Oxaloacetic Transaminase, U/L) | 25.78 ± 20.02 |
| (1) No or less than 1 cup per week | 1. (25.89%) | X20. SGPT (Serum Glutamic-Pyruvic Transaminase, U/L) | 36.97 ± 36.02 |
| (2) 1 to 3 cups per week | 460 (33.45%) | X21. BUN (Blood Urea Nitrogen, mg/dL) | 13.63 ± 3.01 |
| (3) 4 to 6 cups per week | 266 (19.35%) | X22. e-GFR (Estimated Glomerular Filtration Rate, ml/min/1.73m2) | 84.56 ± 11.23 |
| (4) 1 cup per day | 198 (14.40%) | X23. UA (Uric acid, mg/dL) | 6.68 ± 1.27 |
| (5) 2 or more than 2 cups per day | 95 (6.91%) | X24. AFP (Alpha–Fetoprotein, ng/mL) | 2.74 ± 1.33 |
| X7. Daily physical activity | | X25. TG (Triglyceride, mg/dL) | 118.3 ± 68.94 |
| (1) Sedentary most of the time | 928 (67.49%) | X26. T-Cho (Total Cholesterol, mg/dl) | 193.42 ± 32.54 |
| (2) Frequent repeated sitting and ambulation | 311 (22.62%) | X27. HDL-C (High Density Lipoprotein-Cholesterol, mg/dL) | 52.36 ± 11.67 |
| (3) Standing or ambulation most of the time | 111 (8.07%) | X28. LDL-C (Low Density Lipoprotein-Cholesterol, mg/dL) | 119.55 ± 30.63 |
| (4) Requires whole body muscle usage most of the time | 25 (1.82%) | X29. C/H (T-Cho/HDL-C) | 3.85 ± 0.96 |
| **Dependent Variable** | | **Mean ± SD** | |
| Y. S-C (sperm count) | | 53.3 ± 42.24 | |
